# Supplementary material for: Carriage of Streptococcus pneumoniae in Aged Adults with Influenza-Like-Illness
Source: PubMed Central journal article supplement (PMC4366201; doi:10.1371/journal.pone.0119875), 2015-03-19
Supplement: pone.0119875.s001.pdf [file pone.0119875.s001.pdf]

**Figure S1. Impact of culture-enrichment on *S. pneumoniae* gene *lytA* detection by qPCR in saliva samples (n=270) from elderly.**

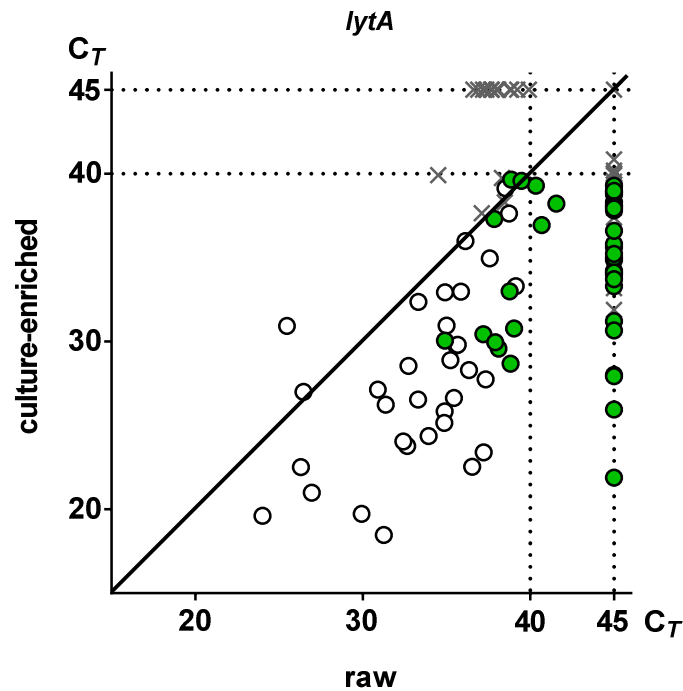

Each dot or cross represents an individual sample. The position of symbols corresponds to  $C_T$  values for *lytA*-specific signals in DNA extracted from raw and culture-enriched sample of saliva as marked on corresponding axes. Dots represent 76 saliva samples classified as positive and crosses represent 194 saliva samples classified as negative for *S. pneumoniae* in the study. Open dots represent 32 saliva samples classified as positive for *S. pneumoniae* in both raw and culture-enriched samples. Green dots represent 44 samples classified as positive only after culture-enrichment. Dotted lines mark the threshold assigned to discriminate between positive ( $C_T < 40$ ) and negative samples, and the total number of 45 cycles in qPCR reaction. There was a significantly higher number of saliva samples classified as positive for *S. pneumoniae* after culture-enrichment compared to raw saliva samples (76 or 29% versus 31 or 11%; Fisher's exact,  $p < 0.001$ ). Culture-enrichment increased the signal strength of the genes targeted with qPCR, with an average overall increase of 2.10  $C_T$  for the *lytA* gene (maximum observed increase of 23.11  $C_T$ ) and of overall increase of 1.90  $C_T$  for the *piaA* (maximum increase of 21.30  $C_T$ ). In the subset of 76 saliva samples identified as positive either in raw or culture-enriched sample an average increase for *lytA* was 6.92  $C_T$  and for *piaA* was 6.64  $C_T$ .
